# Supplementary material for: Wind Speed and Landscape Context Mediate Campylobacter Risk among Poultry Reared in Open Environments
Source: Animals (Basel). 2023 Jan 31;13(3):492. doi: 10.3390/ani13030492 (PMC9913591; doi:10.3390/ani13030492)
Supplement: Supplementary file 1 [file animals-13-00492-s001.zip › animals-2053276-Supplementary Data.xlsx]

## Sheet: animals-2053276-Supplementary D
Masked farm	Masked flock ID	State	Year	Date	Bacteriology lab	Campy_yes	Campy_no	Total samples tested	Poultry_type	Number rotations	Rotates flock	Flock_size	Pasture_size_m	Flock_enclosure_m	Flock_density_m	Poultry_age	PC1	PC2	PC3	PC4	PC5	PC6	SOM	Temp.mean	Humidity.mean	Windspeed.mean	Precip.mean	Percent agriculture	Total bird contacts	Bird contact per area
Farm_01	Farm_01_flock_1	WA	2018	2018-07-11	AHFSL	0	15	15	Layer	1	0	62	1603	1603	0.0386775	9	-1.06692	-0.159668	-0.504378	0.280948	-0.30269	-0.734296	7.8	21.1032	57.8571	10.6906	0	0.523123	8	0.00499064
Farm_01	Farm_01_flock_1	WA	2019	2019-05-13	WADDL	0	15	15	Layer	1	0	75	1603	1603	0.0467873	16	-1.06692	-0.159668	-0.504378	0.280948	-0.30269	-0.734296	7.8	18.3492	52.2857	8.16165	0	0.523123	8	0.00499064
Farm_02	Farm_02_flock_1	WA	2017	2017-08-11	AHFSL	0	5	5	Layer	52	1	150	15000	185	0.810811	12	0.742083	0.322165	-0.095367	0.235772	-0.270347	0.396331	NA	21.2381	66.5714	7.7938	0	0.291631	36	0.0692308
Farm_02	Farm_02_flock_2	WA	2017	2017-08-11	AHFSL	5	1	6	Broiler	104	1	250	15000	335	0.746269	2	2.21651	-0.301574	-0.599831	0.239867	-1.17012	0.651785	NA	21.2381	66.5714	7.7938	0	0.291631	36	0.0692308
Farm_03	Farm_03_flock_1	WA	2017	2017-08-07	AHFSL	0	12	12	Layer	2	1	45	3981	3981	0.0113037	25	-2.74807	-1.44221	1.26756	-1.59876	-0.635112	-1.0136	7.5	23.881	39.2143	11.5413	0	0.041733	6	0.00150716
Farm_03	Farm_03_flock_2	WA	2018	2018-07-24	AHFSL	0	10	10	Layer	2	1	26	3981	3981	0.00653102	36	-2.74807	-1.44221	1.26756	-1.59876	-0.635112	-1.0136	7.5	22.5714	42.4429	12.5988	0	0.041733	1	0.000251193
Farm_03	Farm_03_flock_2	WA	2019	2019-06-29	WADDL	0	17	17	Layer	2	1	30	3981	3981	0.00753579	48	-2.74807	-1.44221	1.26756	-1.59876	-0.635112	-1.0136	7.5	17.246	59.9857	12.5758	0	0.041733	5	0.00125597
Farm_04	Farm_04_flock_1	WA	2018	2018-06-07	AHFSL	6	1	7	Layer	1	0	10	472	472	0.0211864	18	-1.58266	0.859612	0.271507	0.184691	-0.137714	0.11758	7.9	15.9603	54.6	8.92034	0.326571	0.857473	31	0.065678
Farm_04	Farm_04_flock_1	WA	2019	2019-06-13	WADDL	7	5	12	Layer	1	0	26	472	472	0.0550847	32	-1.58266	0.859612	0.271507	0.184691	-0.137714	0.11758	7.9	17.0397	54.7857	10.1618	0.544286	0.857473	12	0.0254237
Farm_05	Farm_05_flock_1	CA	2018	2018-06-17	AHFSL	0	8	8	Layer	1	0	30	75	75	0.4	26	-1.53312	1.17402	0.475091	-0.153116	0.129147	0.491148	6	19.8413	72.5714	11.3344	0	0.01	2	0.0266667
Farm_05	Farm_05_flock_1	CA	2019	2019-05-26	WADDL	0	14	14	Layer	1	0	30	75	75	0.4	34	-1.53312	1.17402	0.475091	-0.153116	0.129147	0.491148	6	15.7698	66.5286	10.9665	0.907143	0.01	4	0.0533333
Farm_06_01	Farm_06_01_flock_3	WA	2018	2018-07-17	AHFSL	1	15	16	Layer	26	1	100	36412	805	0.124224	19	-0.823794	-0.189836	1.51696	0.359707	0.153567	0.484628	8.7	23.3968	48.6571	12.8287	0	0.198177	4	0.00496894
Farm_06_01	Farm_06_01_flock_3	WA	2019	2019-06-25	WADDL	0	5	5	Layer	26	1	25	36412	805	0.0310559	40	-0.823794	-0.189836	1.51696	0.359707	0.153567	0.484628	8.7	15.2222	65.3429	12.4379	2.54	0.198177	22	0.0273292
Farm_06_01	Farm_06_01_flock_4	WA	2018	2018-07-17	AHFSL	2	3	5	Broiler	156	1	150	36412	50	3	3	3.82632	0.723307	0.681649	-0.604883	0.0436661	-0.424907	8.7	23.3968	48.6571	12.8287	0	0.198177	NA	0
Farm_06_01	Farm_06_01_flock_5	WA	2019	2019-06-25	WADDL	1	9	10	Broiler	104	1	200	36412	50	4	2	3.82632	0.723307	0.681649	-0.604883	0.0436661	-0.424907	8.7	15.2222	65.3429	12.4379	2.54	0.198177	NA	0
Farm_06_01	Farm_06_01_flock_6	WA	2019	2019-06-25	WADDL	1	9	10	Broiler	104	1	200	36412	50	4	1.5	3.82632	0.723307	0.681649	-0.604883	0.0436661	-0.424907	8.7	15.2222	65.3429	12.4379	2.54	0.198177	NA	0
Farm_06_02	Farm_06_02_flock_1	WA	2017	2017-07-14	AHFSL	0	5	5	Layer	104	1	100	17460	125	0.8	7	1.58988	0.592203	0.38696	0.539517	-1.31606	0.123544	NA	18.627	61.2	10.7596	0	0.557017	11	0.0628571
Farm_06_02	Farm_06_02_flock_2	WA	2017	2017-07-14	AHFSL	5	0	5	Broiler	104	1	250	17460	50	5	2	4.12598	1.1096	-0.169742	-1.80871	0.674232	-0.566998	NA	18.627	61.2	10.7596	0	0.557017	11	0.0628571
Farm_07	Farm_07_flock_1	WA	2018	2018-07-18	AHFSL	5	10	15	Layer	26	1	80	4023	80	1	18	-0.177293	1.00514	0.0130347	-0.0441841	0.00515444	0.155202	8.6	23.0238	50.5857	12.162	0	0.557017	3	0.0375
Farm_08	Farm_08_flock_1	WA	2018	2018-07-26	AHFSL	1	15	16	Layer	8	1	75	2394	496	0.15121	24	-1.40828	0.564589	0.373304	-0.24359	-0.0553487	0.603234	12.1	19.3889	64.5429	7.28801	0	0.344607	4	0.00806452
Farm_08	Farm_08_flock_1	WA	2019	2019-06-28	WADDL	0	20	20	Layer	8	1	75	2394	496	0.15121	35	-1.40828	0.564589	0.373304	-0.24359	-0.0553487	0.603234	12.1	15.3333	70.4286	12.6908	3.26571	0.344607	5	0.0100806
Farm_09	Farm_09_flock_1	CA	2018	2018-07-03	AHFSL	1	9	10	Layer	1	0	84.5	968	968	1.73248	34	-0.691194	1.7576	1.00449	-2.06467	1.33564	0.37692	5.6	30.3333	23	14.3691	0	0.443212	41	0.0423554
Farm_09	Farm_09_flock_1	CA	2019	2019-05-20	WADDL	6	10	16	Layer	1	0	65	26	26	2.5	46	-0.691194	1.7576	1.00449	-2.06467	1.33564	0.37692	5.6	14.1349	72.2	16.9441	6.64029	0.443212	18	0.692308
Farm_10	Farm_10_flock_1	WA	2018	2018-07-11	AHFSL	0	12	12	Layer	1	0	45	60	60	0.75	20	-1.13851	1.19914	0.206419	-0.162362	0.276904	0.279018	6.4	21.1032	57.8571	10.6906	0	0.205809	0	0
Farm_10	Farm_10_flock_1	WA	2019	2019-05-15	WADDL	0	19	19	Layer	1	0	45	60	60	0.75	31	-1.13851	1.19914	0.206419	-0.162362	0.276904	0.279018	6.4	17.5159	57.8143	8.39156	0.399143	0.205809	0	0
Farm_11	Farm_11_flock_1	WA	2017	2017-08-09	AHFSL	0	6	6	Layer	52	1	250	19526	660	0.378788	12	0.667447	-0.631414	-0.337754	-0.141655	-0.304876	0.996961	11.2	22.8889	59.8	8.00072	0	0.162219	33	0.025
Farm_11	Farm_11_flock_2	WA	2017	2017-08-09	AHFSL	0	6	6	Layer	52	1	250	19526	660	0.378788	24	0.667447	-0.631414	-0.337754	-0.141655	-0.304876	0.996961	11.2	22.8889	59.8	8.00072	0	0.162219	33	0.025
Farm_11	Farm_11_flock_3	WA	2018	2018-07-13	AHFSL	1	10	11	Layer	52	1	250	12517	660	0.378788	9	0.667447	-0.631414	-0.337754	-0.141655	-0.304876	0.996961	11.2	20.3254	58.9714	12.8057	0.0362857	0.162219	3	0.00227273
Farm_11	Farm_11_flock_3	WA	2019	2019-06-24	WADDL	4	12	16	Layer	52	1	250	12517	660	0.378788	20	0.667447	-0.631414	-0.337754	-0.141655	-0.304876	0.996961	11.2	15.0079	68.3714	12.277	2.54	0.162219	13	0.019697
Farm_11	Farm_11_flock_4	WA	2018	2018-07-13	AHFSL	0	10	10	Layer	52	1	250	12517	660	0.378788	21	0.667447	-0.631414	-0.337754	-0.141655	-0.304876	0.996961	7.9	20.3254	58.9714	12.8057	0.0362857	0.162219	3	0.00227273
Farm_11	Farm_11_flock_5	WA	2019	2019-06-24	WADDL	15	1	16	Layer	52	1	250	19526	660	0.378788	8	0.667447	-0.631414	-0.337754	-0.141655	-0.304876	0.996961	7.9	15.0079	68.3714	12.277	2.54	0.162219	5	0.00757576
Farm_12	Farm_12_flock_1	CA	2018	2018-06-20	AHFSL	0	9	9	Layer	26	1	400	43473	3181	0.125747	9	0.332642	-3.0671	-0.525273	-0.688959	0.147088	0.339285	7.8	17.8492	65.9429	15.8405	0	0.076349	34	0.00534423
Farm_12	Farm_12_flock_1	CA	2019	2019-05-28	WADDL	8	7	15	Layer	26	1	370	20323	2920	0.126712	21	0.332642	-3.0671	-0.525273	-0.688959	0.147088	0.339285	7.8	15.3254	76.2714	13.4035	0.471714	0.076349	38	0.00655285
Farm_12	Farm_12_flock_2	CA	2018	2018-06-20	AHFSL	1	8	9	Layer	26	1	295	43473	3181	0.0927381	23	0.332642	-3.0671	-0.525273	-0.688959	0.147088	0.339285	7.8	17.8492	65.9429	15.8405	0	0.076349	34	0.00534423
Farm_12	Farm_12_flock_3	CA	2019	2019-05-28	WADDL	9	6	15	Layer	26	1	373	20323	2879	0.129559	9	0.332642	-3.0671	-0.525273	-0.688959	0.147088	0.339285	7.8	15.3254	76.2714	13.4035	0.471714	0.076349	38	0.00655285
Farm_13	Farm_13_flock_1	CA	2018	2018-06-26	AHFSL	8	2	10	Layer	26	1	150	7287	1357	0.110538	18	0.0191545	-1.47602	-0.192298	-0.0256475	-0.0128119	0.227613	4	23.9841	49.4429	14.7599	0	0.23116	3.5	1.9e-06
Farm_13	Farm_13_flock_1	CA	2019	2019-05-21	WADDL	6	9	15	Layer	26	1	150	7287	1357	0.110538	18	0.0191545	-1.47602	-0.192298	-0.0256475	-0.0128119	0.227613	4	13.3095	78.3714	17.5188	8.49086	0.23116	10	0.0073692
Farm_13	Farm_13_flock_2	CA	2018	2018-06-26	AHFSL	1	10	11	Layer	26	1	300	42670	2261	0.132685	18	0.0191545	-1.47602	-0.192298	-0.0256475	-0.0128119	0.227613	7.3	23.9841	49.4429	14.7599	0	0.23116	2	0.000884564
Farm_13	Farm_13_flock_4	CA	2019	2019-05-21	WADDL	18	2	20	Layer	26	1	300	42670	2261	0.132685	7	0.0191545	-1.47602	-0.192298	-0.0256475	-0.0128119	0.227613	7.3	13.3095	78.3714	17.5188	8.49086	0.23116	5	0.00221141
Farm_14	Farm_14_flock_1	OR	2018	2018-07-06	AHFSL	2	7	9	Layer	156	1	60	21795	25	2.4	36	1.45258	0.771693	1.58725	-0.783876	-1.22467	0.0962017	8.4	16.4841	63.1571	11.4953	0	0.046034	7	0.0933333
Farm_14	Farm_14_flock_2	OR	2018	2018-07-06	AHFSL	4	4	8	Layer	156	1	60	21795	25	2.4	36	1.45258	0.771693	1.58725	-0.783876	-1.22467	0.0962017	8.4	16.4841	63.1571	11.4953	0	0.046034	7	0.0933333
Farm_14	Farm_14_flock_3	OR	2018	2018-07-06	AHFSL	1	7	8	Layer	156	1	60	21795	25	2.4	6	1.45258	0.771693	1.58725	-0.783876	-1.22467	0.0962017	8.4	16.4841	63.1571	11.4953	0	0.046034	7	0.0933333
Farm_14	Farm_14_flock_4	OR	2019	2019-05-17	WADDL	5	15	20	Layer	12	1	110	9860	2307	0.047681	11	1.45258	0.771693	1.58725	-0.783876	-1.22467	0.0962017	8.4	13.8413	75.0857	10.3687	2.39486	0.046034	12	0.00520156
Farm_15	Farm_15_flock_1	ID	2017	2017-08-02	WADDL	0	5	5	Layer	4	1	150	8800	790	0.189873	10	-0.369239	-1.17103	-0.613674	-0.0656099	0.116107	-0.682026	8.4	28.0238	25.2714	7.05811	0	0.156011	4	0.00425532
Farm_15	Farm_15_flock_2	ID	2017	2017-08-02	WADDL	0	5	5	Broiler	1	0	200	19100	150	1.33333	2.5	0.848099	0.108728	-1.09766	0.506705	1.02509	-0.0511936	8.4	28.0238	25.2714	7.05811	0	0.156011	4	0.00425532
Farm_15	Farm_15_flock_3	ID	2018	2018-06-13	AHFSL	3	13	16	Layer	4	1	250	16331	790	0.316456	19	-0.369239	-1.17103	-0.613674	-0.0656099	0.116107	-0.682026	8.4	17.746	55.2143	9.08128	3.01171	0.156011	3	0.00379747
Farm_15	Farm_15_flock_4	ID	2019	2019-06-14	WADDL	2	23	25	Layer	4	1	225	16331	7178	0.0313458	11	-0.369239	-1.17103	-0.613674	-0.0656099	0.116107	-0.682026	8.4	21.6825	43.5857	8.23062	0.0362857	0.156011	6	0.000831025
Farm_15	Farm_15_flock_5	ID	2019	2019-06-14	WADDL	0	5	5	Layer	4	1	50	16331	42	1.19048	2	-0.369239	-1.17103	-0.613674	-0.0656099	0.116107	-0.682026	8.4	21.6825	43.5857	8.23062	0.0362857	0.156011	6	0.000831025
Farm_16	Farm_16_flock_1	WA	2018	2018-07-19	AHFSL	3	12	15	Layer	4	1	50	3897	633	0.0789889	36	-1.03461	-1.83773	0.331193	-0.659949	-0.211061	-0.462028	4.3	21.8968	53.5	11.8861	0	0.260588	1	0.00157978
Farm_16	Farm_16_flock_2	WA	2019	2019-06-23	WADDL	9	17	26	Layer	24	1	275	35811	5472	0.0502558	11	-1.03461	-1.83773	0.331193	-0.659949	-0.211061	-0.462028	4.3	15.2857	69.4571	12.231	2.54	0.260588	19	0.00347222
Farm_17	Farm_17_flock_1	WA	2017	2017-08-17	WADDL	1	1	2	Layer	1	0	10	306	306	0.0326797	12	-1.20221	0.982292	-0.17025	0.682587	-0.18072	-0.218661	6.7	20.1587	44.5429	7.65586	0.217714	0.896777	3	0.00980392
Farm_17	Farm_17_flock_1	WA	2018	2018-06-03	AHFSL	1	4	5	Layer	1	0	10	306	306	0.0326797	14.4	-1.20221	0.982292	-0.17025	0.682587	-0.18072	-0.218661	6.7	15.2302	55.6429	11.1964	0	0.896777	5	0.0163399
Farm_17	Farm_17_flock_2	WA	2019	2019-06-12	WADDL	0	4	4	Layer	1	0	10	306	306	0.0326797	24	-1.20221	0.982292	-0.17025	0.682587	-0.18072	-0.218661	6.7	15.3492	58.6286	10.2538	1.74171	0.896777	14	0.0457516
Farm_18	Farm_18_flock_1	WA	2017	2017-06-15	WADDL	11	0	11	Broiler	52	1	75	6396	40	1.875	4	1.1975	1.25617	-0.318313	0.160343	-0.163015	-0.635157	6.6	12.9286	60.3857	15.3577	1.12486	0.923062	11	0.0289474
Farm_18	Farm_18_flock_2	WA	2017	2017-06-15	WADDL	7	4	11	Layer	3	1	175	6519	340	0.514706	12	-0.656559	0.292766	-0.330396	0.0137542	0.326171	0.556058	6.6	12.9286	60.3857	15.3577	1.12486	0.923062	11	0.0289474
Farm_18	Farm_18_flock_3	WA	2018	2018-06-04	AHFSL	2	11	13	Layer	3	1	125	6519	340	0.367647	24	-0.656559	0.292766	-0.330396	0.0137542	0.326171	0.556058	6.6	14.7778	55.8143	11.7482	0.326571	0.923062	14	0.0411765
Farm_18	Farm_18_flock_3	WA	2019	2019-06-12	WADDL	3	15	18	Layer	3	1	125	6519	340	0.367647	24	-0.656559	0.292766	-0.330396	0.0137542	0.326171	0.556058	6.6	15.3492	58.6286	10.2538	1.74171	0.923062	4	0.0117647
Farm_19	Farm_19_flock_1	WA	2017	2017-08-11	AHFSL	7	2	9	Broiler	1	0	100	160	160	0.625	3.5	-0.299367	0.642324	-1.1061	0.917216	-0.0220346	-0.573329	NA	21.2381	66.5714	7.7938	0	0.186976	15	0.09375
Farm_19	Farm_19_flock_2	WA	2019	2019-05-14	WADDL	0	11	11	Broiler	1	0	50	650	650	0.0769231	2	-0.299367	0.642324	-1.1061	0.917216	-0.0220346	-0.573329	NA	16.7619	59.3143	11.8172	0	0.186976	11	0.0169231
Farm_20	Farm_20_flock_1	WA	2018	2018-06-05	AHFSL	0	7	7	Layer	1	0	13	25	25	0.52	3	-0.384005	1.25923	-0.83255	1.11605	-0.00538872	-0.760997	2.8	14.4127	56.4143	10.2538	0.326571	0.756468	8	0.32
Farm_21	Farm_21_flock_1	CA	2018	2018-07-02	AHFSL	3	10	13	Layer	1	0	75	1218	1218	0.0615764	25	-1.60996	0.0988456	0.209023	-0.336321	-0.129662	0.137036	5.1	23.5556	53.0857	15.1738	0	0.851647	6	0.00492611
Farm_21	Farm_21_flock_1	CA	2019	2019-05-21	WADDL	2	18	20	Layer	1	0	75	1218	1218	0.0615764	30	-1.60996	0.0988456	0.209023	-0.336321	-0.129662	0.137036	5.1	13.3095	78.3714	17.5188	8.49086	0.851647	9	0.00738916
Farm_22	Farm_22_flock_1	WA	2017	2017-06-13	WADDL	6	5	11	Broiler	2	1	350	2938	2938	0.119129	3	0.458798	-2.99129	-2.55921	-0.875075	0.167345	0.2519	5.4	17.0397	49.2143	17.7027	0.217714	0.924868	8	0.00234055
Farm_22	Farm_22_flock_2	WA	2017	2017-06-13	WADDL	7	5	12	Layer	1	0	125	480	480	0.260417	11	-0.531965	0.329361	-0.906446	0.406198	0.0719276	0.0449066	5.4	17.0397	49.2143	17.7027	0.217714	0.924868	8	0.00234055
Farm_22	Farm_22_flock_3	WA	2018	2018-06-06	AHFSL	12	3	15	Broiler	2	1	500	2950	2950	0.169492	4	0.458798	-2.99129	-2.55921	-0.875075	0.167345	0.2519	5.4	15.9524	45.6857	14.8059	0	0.924868	9	0.00305085
Farm_22	Farm_22_flock_4	WA	2019	2019-06-11	WADDL	3	22	25	Broiler	2	1	500	2950	2950	0.169492	3	0.458798	-2.99129	-2.55921	-0.875075	0.167345	0.2519	5.4	15.627	51.1286	15.3807	0.834571	0.924868	8	0.00271186
Farm_23	Farm_23_flock_1	OR	2018	2018-07-09	AHFSL	1	22	23	Layer	52	1	100	92509	2574	0.03885	24	0.369829	-2.57625	2.8493	0.967759	0.469918	-0.262686	6.1	18.8095	60.7571	8.75941	0	0.502244	10	0.003885
Farm_23	Farm_23_flock_1	OR	2019	2019-05-16	WADDL	2	13	15	Layer	52	1	125	92509	2574	0.0485625	24	0.369829	-2.57625	2.8493	0.967759	0.469918	-0.262686	6.1	14.8016	67.4286	7.90876	0.544286	0.502244	11	0.0042735
Farm_23	Farm_23_flock_2	OR	2019	2019-05-16	WADDL	0	9	9	Broiler	52	1	150	92509	400	0.375	2.5	1.97847	-1.36725	1.44674	2.41897	0.953903	0.0567289	6.1	14.8016	67.4286	7.90876	0.544286	0.502244	1	0.00127388
Farm_23	Farm_23_flock_3	OR	2019	2019-05-16	WADDL	0	6	6	Broiler	52	1	150	92509	385	0.38961	1	1.97847	-1.36725	1.44674	2.41897	0.953903	0.0567289	6.1	14.8016	67.4286	7.90876	0.544286	0.502244	1	0.00127388
Farm_24	Farm_24_flock_1	CA	2018	2018-06-19	AHFSL	5	5	10	Layer	1	0	62.5	103	103	0.606796	10	-0.583971	0.984755	-0.50901	0.305834	0.234853	-0.0632774	2.6	15.246	74.2429	11.1504	0	0.253266	4	0.038835
Farm_24	Farm_24_flock_2	CA	2019	2019-05-27	WADDL	1	14	15	Layer	1	0	85	103	103	0.825243	18	-0.583971	0.984755	-0.50901	0.305834	0.234853	-0.0632774	2.6	13.1984	79.3571	13.0357	1.23371	0.253266	0	0
Farm_25	Farm_25_flock_1	CA	2018	2018-06-28	AHFSL	6	14	20	Layer	12	1	152	3526	294	0.517007	6	-0.206275	0.388609	-0.728475	0.300311	0.0734892	0.234346	4.3	23.754	51.9429	15.1278	0	0.654156	3	0.0102041
Farm_25	Farm_25_flock_1	CA	2019	2019-05-21	WADDL	10	11	21	Layer	12	1	125	3526	303	0.412541	18	-0.206275	0.388609	-0.728475	0.300311	0.0734892	0.234346	4.3	13.3095	78.3714	17.5188	8.49086	0.654156	2	0.00660066
Farm_26	Farm_26_flock_1	WA	2017	2017-07-17	WADDL	5	5	10	Layer	1	0	155	1304	1304	0.118865	10	-0.737067	-0.414444	-0.852958	-0.013226	-0.0378121	-0.0267088	4.3	23.627	32.9	17.3809	0	0.427948	2	0.00153374
Farm_26	Farm_26_flock_2	WA	2018	2018-07-30	AHFSL	10	10	20	Layer	1	0	175	1304	1304	0.134202	10	-0.737067	-0.414444	-0.852958	-0.013226	-0.0378121	-0.0267088	4.3	28.2063	28.8857	10.9665	0	0.427948	24	0.0184049
Farm_26	Farm_26_flock_2	WA	2019	2019-06-22	WADDL	3	17	20	Layer	1	0	150	1304	1304	0.115031	22	-0.737067	-0.414444	-0.852958	-0.013226	-0.0378121	-0.0267088	4.3	20.7222	35.3857	20.8984	0	0.427948	22	0.0168712
Farm_27	Farm_27_flock_1	WA	2017	2017-06-28	WADDL	0	5	5	Layer	1	0	15	420	45	0.333333	24	-1.04021	1.20366	-0.170809	0.634371	-0.0247463	-0.144556	NA	20.0159	43.8429	10.3228	0.0725714	0.938277	22	0.488889
Farm_27	Farm_27_flock_2	WA	2019	2019-06-15	WADDL	1	4	5	Layer	1	0	10	420	45	0.222222	8	-1.04021	1.20366	-0.170809	0.634371	-0.0247463	-0.144556	NA	19.5873	49.8714	8.09268	0	0.938277	2	0.0444444

## Sheet: Meta-data
Column	Description
Masked farm	Masked farm ID. The farm with two locations is designated Farm_06_01 and Farm_06_02
Masked flock ID	Masked flock ID
State	State in the United States that the farm was in. CA = California, OR = Oregon, WA = Washington State, ID = Idaho
Year	Year samples were collected
Date	Date fecal samples were collected
Bacteriology lab	Bacteriology lab that tested those samples for Campylobacter. AHFSL = Avian Health and Food Safety Laboratory, WADDL = Washington Animal Disease and Diagnostics Laboratory
Campy_yes	Number of chicken fecal samples in which Campylobacter spp. were detected
Campy_no	Number of chicken fecal samples in which Campylobacter spp. were NOT detected
Total samples tested	Total chicken fecal samples that were tested for Campylobacter spp.
Poultry_type	Type of poultry flock that row corresponds to (broiler or layer)
Number rotations	Number of times per year that farmers moved flocks to a new section of pasture
Rotational	That flock is rotated >1 times annually: 0 = no, 1 = yes. Used in models that included wild bird contact
Flock_size	Number of individual chickens in a flock
Pasture_size_m	All the area throughout a year where the farmer kept flocks in meters squared
Flock_enclosure_m	Amount of space within the fencing that contained the birds during that survey in meters squared. If a flock was not completely fenced, we estimated foraging space by visually inspecting where approximately 95 percent of the flock resided during the day.
Flock_density_m	The number of individuals within a flock, divided by the flock’s enclosed space or estimated foraging space (if flock was not enclosed) at the time of the survey
Poultry_age	Average age of the poultry in months. Most flocks (n =44) contained a cohort of single aged birds, but some flocks (n = 18) consisted of mixed ages. We estimated the average age of mixed-cohort flocks by estimating the percentage of each flock containing each age cohort of birds then weighting each cohort’s age reported to us by the farmers by their representation within the flock
PC1	Principal component 1 from our PCA that included age, enclosure size, pasture size, flock size, rotations/year, and flock density. This was used in analyses
PC2	Principal component 2 from our PCA that included age, enclosure size, pasture size, flock size, rotations/year, and flock density. This was used in analyses
PC3	Principal component 3 from our PCA that included age, enclosure size, pasture size, flock size, rotations/year, and flock density
PC4	Principal component 4 from our PCA that included age, enclosure size, pasture size, flock size, rotations/year, and flock density
PC5	Principal component 5 from our PCA that included age, enclosure size, pasture size, flock size, rotations/year, and flock density
PC6	Principal component 6 from our PCA that included age, enclosure size, pasture size, flock size, rotations/year, and flock density
SOM	Soil organic matter
Temp.mean	Mean daily temperature from the closest weather station on Weather Underground for the seven days preceding fecal sample collection, averaged across the seven days
Humidity.mean	Mean daily humidity (%) from the closest weather station on Weather Underground for the seven days preceding fecal sample collection, averaged across the seven days
Windspeed.mean	Mean daily wind speed (kph) from the closest weather station on Weather Underground for the seven days preceding fecal sample collection, averaged across the seven days
Precip.mean	Mean daily precipitation from the closest weather station on Weather Underground for the seven days preceding fecal sample collection, averaged across the seven days
Percent agriculture	Percent agricultural cover (crop and livestock; NLCD categories 81-82) in a 2.1 km buffer
Total bird contacts	Total number of wild birds that contacted the chicken flock space during point count surveys
Bird contact per area	Total wild bird contacts scaled by poultry enclosure size
Note: See Cornell et al. (2022) Avian Diseases or this publication for more information on metrics
REFERENCE
Cornell, K.A.; Smith, O.M.; Crespo, R.; Jones, M.S.; Crossley, M.S.; Snyder, W.E.; Owen, J.P. Prevalence Patterns for Enteric Parasites of Chickens Managed in Open Environments of the Western United States. Avian Dis. 2022, 66, 60–68, doi:10.1637/21-00079.
